# Supplementary material for: The tuberous sclerosis proteins regulate formation of the primary cilium via a rapamycin-insensitive and polycystin 1-independent pathway
Source: PubMed Central journal article supplement — Hum Mol Genet. 2008 Oct 9;18(1):151–63. doi: 10.1093/hmg/ddn325 (PMC2644647; doi:10.1093/hmg/ddn325), 2008-10-09
Supplement: ddn325_1.pdf [file ddn325_1.pdf]

**Supplemental Table 1. Percentage of Tsc1 and Tsc2-null and wild type MEFs with 2 or >2 centrosomes per cell**

| <b>Cell Type</b>                           | <b>Serum Condition</b>    | <b>Percentage of Cells with 2 Centrosomes</b> | <b>Percentage of Cells with &gt;2 Centrosomes</b> |
|--------------------------------------------|---------------------------|-----------------------------------------------|---------------------------------------------------|
| <b>Tsc1<sup>-/-</sup>/vector</b>           | 24 hr FBS subconfluent    | 97.6                                          | 2.4                                               |
|                                            | 48 hr FBS confluency      | 98.9                                          | 1.1                                               |
|                                            | 48 hr serum deprivation   | 95.1                                          | 4.9                                               |
|                                            | 48 hr FBS, DMSO           | 98.0                                          | 2.0                                               |
|                                            | 48 hr FBS, rapamycin      | 96.4                                          | 3.6                                               |
| <b>Tsc1<sup>-/-</sup>/TSC1</b>             | 24 hr FBS subconfluent    | 98.8                                          | 1.2                                               |
|                                            | 48 hr FBS confluency      | 98.1                                          | 1.9                                               |
|                                            | 48 hr serum deprivation   | 96.0                                          | 4.0                                               |
|                                            | 48 hr FBS, DMSO           | 97.8                                          | 2.2                                               |
|                                            | 48 hr FBS, rapamycin      | 97.1                                          | 2.9                                               |
| <b>Tsc2<sup>-/-</sup>p53<sup>-/-</sup></b> | 24 hour FBS subconfluent  | 97.6                                          | 2.4                                               |
|                                            | 48 hour FBS confluency    | 98.7                                          | 1.3                                               |
|                                            | 48 hour serum deprivation | 97.8                                          | 2.2                                               |
|                                            | 48 hr FBS, DMSO           | 98.3                                          | 1.7                                               |
|                                            | 48 hr FBS, rapamycin      | 97.8                                          | 2.2                                               |
|                                            | 72 hr no serum, DMSO      | 97.0                                          | 3.0                                               |
|                                            | 72 hr no serum, rapamycin | 97.1                                          | 2.9                                               |
| <b>Tsc2<sup>+/+</sup>p53<sup>-/-</sup></b> | 24 hr FBS subconfluent    | 98.0                                          | 2.0                                               |
|                                            | 48 hr FBS confluency      | 98.2                                          | 1.8                                               |
|                                            | 48 hr serum deprivation   | 96.5                                          | 3.5                                               |
|                                            | 48 hr FBS, DMSO           | 98.1                                          | 1.9                                               |
|                                            | 48 hr FBS, rapamycin      | 98.7                                          | 1.3                                               |
|                                            | 72 hr no serum, DMSO      | 96.5                                          | 3.5                                               |
|                                            | 72 hr no serum, rapamycin | 97.1                                          | 2.9                                               |

There are no significant differences in the number of centrosomes per cell for any of the cell lines in any culture condition tested, two-tailed Fisher's exact test.

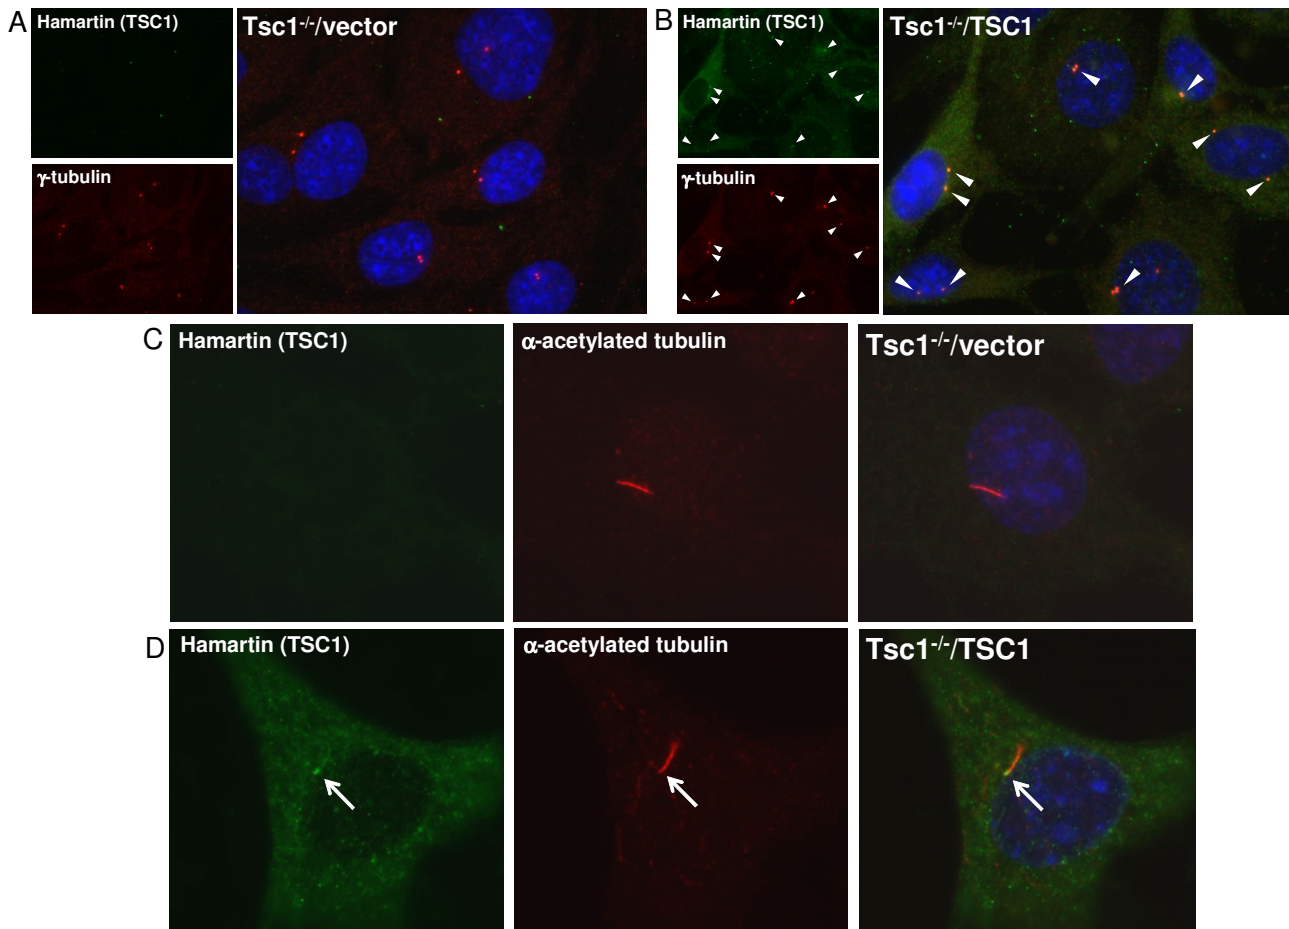

**Supplemental Figure S1. Hamartin localizes to the centrosome and basal body of *Tsc1*<sup>-/-</sup>/TSC1 MEFs.** *Tsc1*<sup>-/-</sup>/vector (Tsc1-null) MEFs and *Tsc1*<sup>-/-</sup>/TSC1 (TSC1 re-expressing) MEFs were grown in 10% FBS for 24 hours. **A)** *Tsc1*<sup>-/-</sup>/vector MEFs were fixed and immunostained with anti-gamma-tubulin antibody (red) to identify centrosomes, and anti-hamartin antibody (TSC1, green). Hamartin was undetectable in the Tsc1-null cells. **B)** *Tsc1*<sup>-/-</sup>/TSC1 MEFs were fixed and immunostained with anti-gamma-tubulin antibody (red) to identify centrosomes, and anti-hamartin antibody (TSC1, green). Arrowheads indicate hamartin colocalization with the centrosome. **C)** *Tsc1*<sup>-/-</sup>/vector MEFs were fixed and immunostained with anti-alpha-acetylated-tubulin antibody (red) to identify cilia, and anti-hamartin antibody (TSC1, green). Hamartin was undetectable in the Tsc1-null cells. **D)** *Tsc1*<sup>-/-</sup>/TSC1 MEFs were fixed and immunostained with anti-alpha-acetylated-tubulin antibody (red) to identify cilia, and anti-hamartin antibody (TSC1,

green). Arrows indicate hamartin localization at the basal body. Re-expressed hamartin staining was also observed in the cytoplasm. Images for hamartin, alpha-acetylated tubulin, and gamma-tubulin were captured with identical settings and exposure times for *Tsc1*<sup>-/-</sup>/vector and *Tsc1*<sup>-/-</sup>/TSCI MEFs. Nuclei were stained with DAPI. All images shown at 100X magnification.

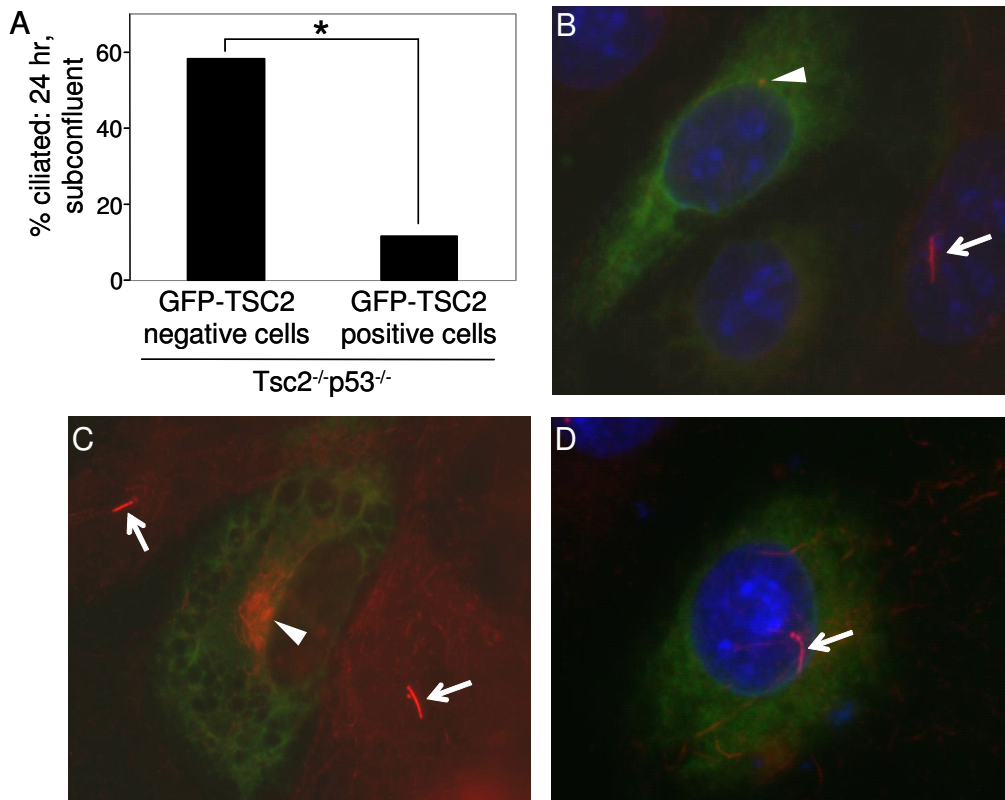

**Supplemental Figure S2. Re-expression of TSC2 reduces the number of ciliated *Tsc2*<sup>-/-</sup>*p53*<sup>-/-</sup> MEFs.** *Tsc2*<sup>-/-</sup>*p53*<sup>-/-</sup> MEFs were transfected with GFP-TSC2 plasmid DNA and grown in 10% FBS at subconfluency for 24 hours. **A**) Percent of cells containing a primary cilium is shown for nontransfected *Tsc2*<sup>-/-</sup>*p53*<sup>-/-</sup> MEFs and GFP-TSC2 transfected *Tsc2*<sup>-/-</sup>*p53*<sup>-/-</sup> MEFs from the same coverslip, asterisk indicates  $p < 0.005$ . **B-C**) Cells were fixed and immunostained with anti-alpha-acetylated-tubulin antibody (cilia, red) and anti-gamma-tubulin antibody (centrosomes/basal body, red). **(B)** Two GFP-TSC2 positive cells (green) lacking a cilium are shown next to a GFP-TSC2 negative cell with a cilium. Arrow indicates the primary cilium, and arrowheads indicate a centrosome in a nonciliated cell. The centrosome of the lower GFP-TSC2 positive cell is out of the plane of this image. **(C)** A GFP-TSC2 positive cell (green) lacking a cilium is shown next to two GFP-TSC2 negative cells with cilia. **(D)** A GFP-TSC2 positive cell (green) with a cilium is shown, indicating that the presence of over-expressed GFP-TSC2 does not block all ciliogenesis. Nuclei were stained with DAPI (B and D). 100X magnification.

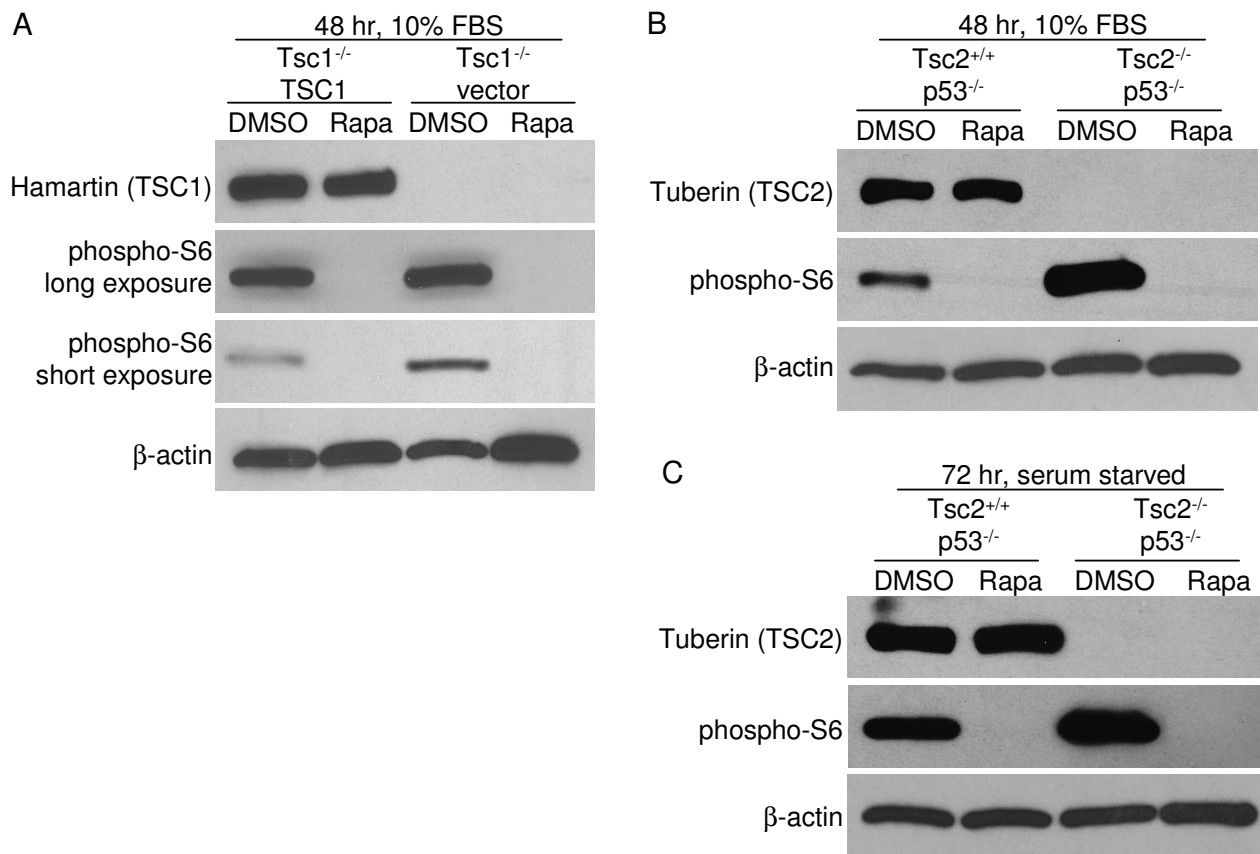

**Supplemental Figure S3. The mTOR pathway is sensitive to rapamycin in cilia inducing conditions.** MEFs were treated with either DMSO vehicle or 20 nmol rapamycin. Immunoblots were probed with phospho-S6 to determine the level of mTOR activation. β-actin was used as a loading control. **A)** Western immunoblot of *Tsc1*<sup>-/-</sup> MEFs with re-introduced TSC1 (*Tsc1*<sup>-/-</sup>/*TSC1*) or Tsc1-null MEFs (*Tsc1*<sup>-/-</sup>/*vector*) treated with DMSO or rapamycin for 48 hours in 10% FBS. **B)** Western immunoblot of *Tsc2*<sup>+/+</sup>*p53*<sup>-/-</sup> or *Tsc2*<sup>-/-</sup>*p53*<sup>-/-</sup> MEFs treated with DMSO or rapamycin for 48 hours in 10% FBS. **C)** Western immunoblot of *Tsc2*<sup>+/+</sup>*p53*<sup>-/-</sup> or *Tsc2*<sup>-/-</sup>*p53*<sup>-/-</sup> MEFs treated with DMSO or rapamycin for 72 hours in serum starvation conditions.
